# Supplementary material for: Pharmacological targeting of BET proteins inhibits renal fibroblast activation and alleviates renal fibrosis
Source: PubMed Central journal article supplement (PMC5342478; doi:10.18632/oncotarget.12498), 2016-10-06
Supplement: oncotarget-07-69291-s001.pdf [file oncotarget-07-69291-s001.pdf]

# Pharmacological targeting of BET proteins inhibits renal fibroblast activation and alleviates renal fibrosis

## Supplementary Material

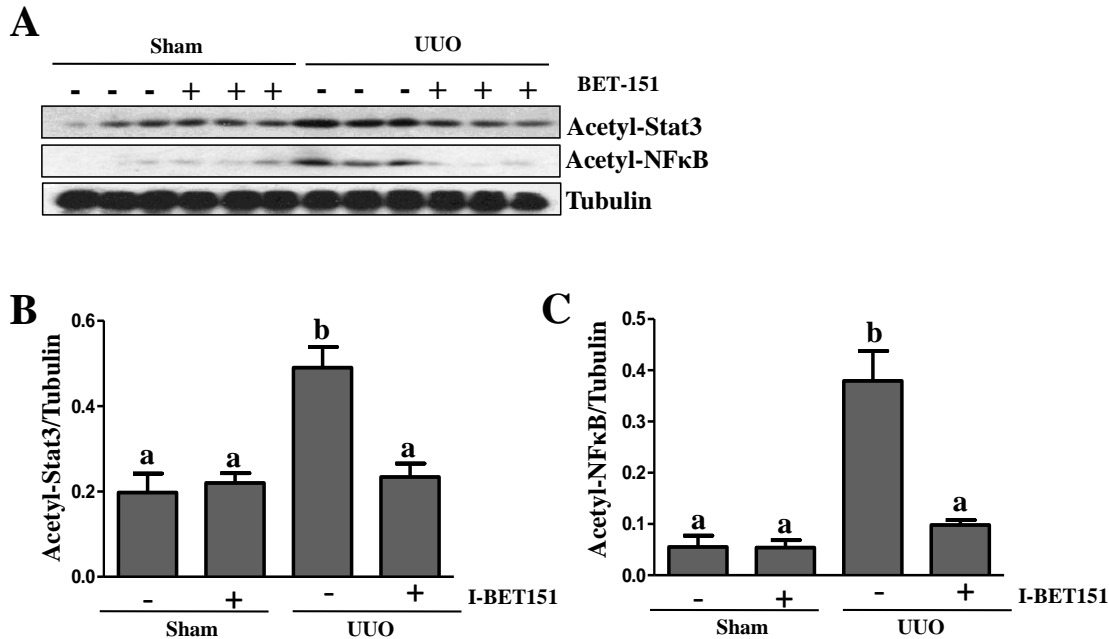

**Supplemental Figure 1. I-BET151 inhibits acetylation of STAT3 and NF-κB in the kidney after obstructed injury.** (A) Kidney tissue lysates were subjected to immunoblot analysis with specific antibodies against acetyl-STAT3, acetyl-NF-κB or tubulin. Expression levels of acetyl-STAT (B) and acetyl-NF-κB (C) were quantified by densitometry and normalized with tubulin. Data are means  $\pm$  SEM. Means with different superscript letters (a-b) are significantly different from one another ( $P < 0.05$ ).

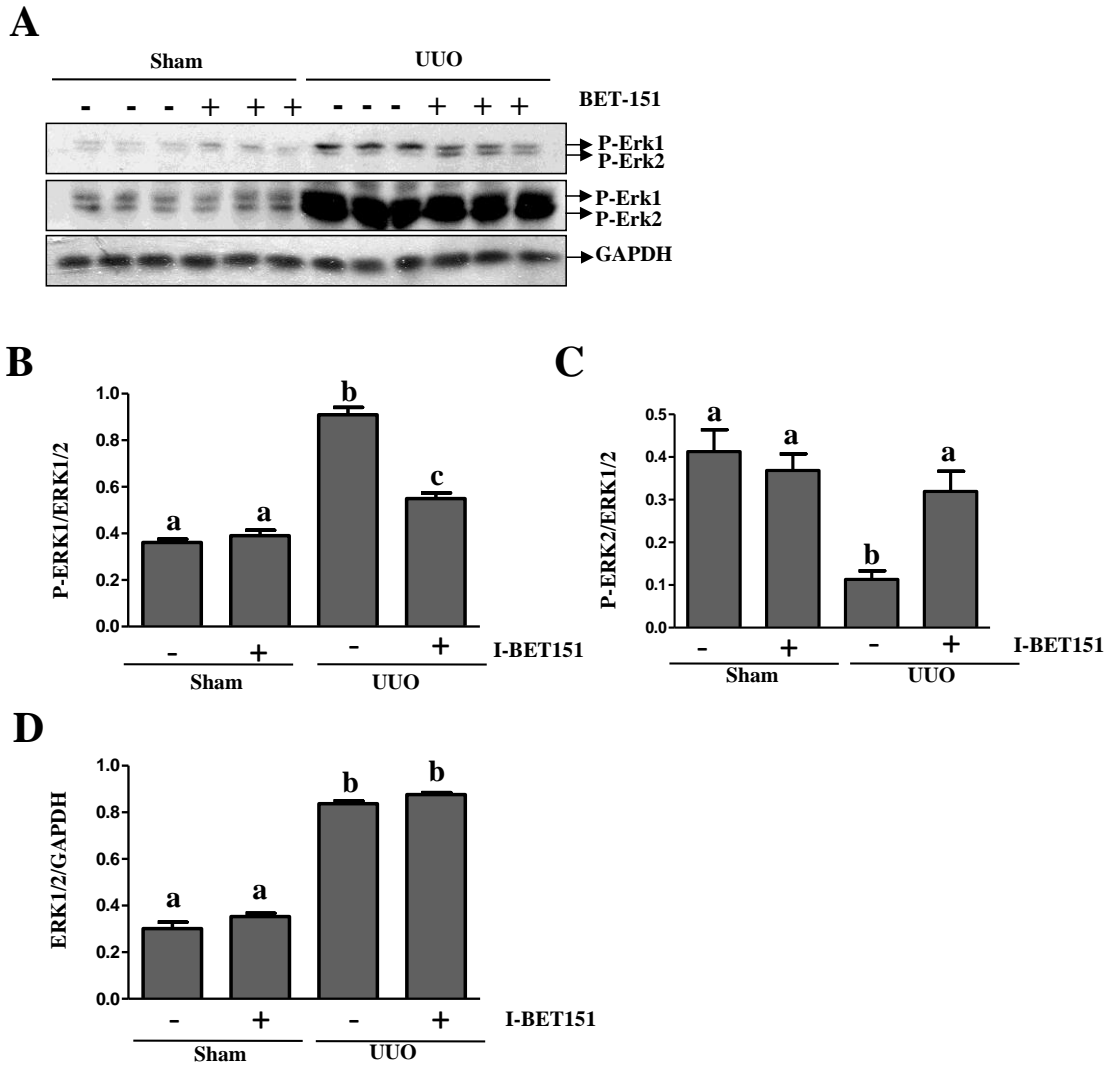

**Supplemental Figure 2. Effect of I-BET151 on phosphorylation of Erk1 and Erk2 in the**

**kidney after obstructed injury.** (A) Kidney tissue lysates were subjected to immunoblot

analysis with specific antibodies against phospho-Erk1/Erk2 and total Erk1/Erk2 or GAPDH.

Expression levels of phospho-Erk1 (B) and Phospho-Erk2 (C) were quantified by densitometry

and normalized with total Erk1 and Erk2, respectively. Expression levels of total Erk1/2 were

normalized with total Erk1/Erk2. Data are means  $\pm$  SEM. Means with different superscript letters

(a-c) are significantly different from one another ( $P < 0.05$ ).
